# Supplementary material for: Rhodamine-deoxylactam functionalized poly[styrene-alter-(maleic acid)]s as lysosome activatable probes for intraoperative detection of tumors
Source: Royal Society of Chemistry journal article supplement (doi:10.1039/c2sc20733h), 2012-01-01
Supplement: c2sc20733h.pdf [file c2sc20733h.pdf]

## Electronic Supplementary Information

### Rhodamine-deoxylactam functionalized poly[styrene-alt-(maleic acid)] as lysosome activatable probes for intraoperative detection of tumors

Zhu Li,<sup>a</sup> Yunlong Song,<sup>b</sup> Yuhui Yang,<sup>a</sup> Xuanjun Wu,<sup>a</sup> Xiaohong Huang,<sup>c</sup> Jiahuai Han<sup>b</sup> and Shoufa Han<sup>a,\*</sup>

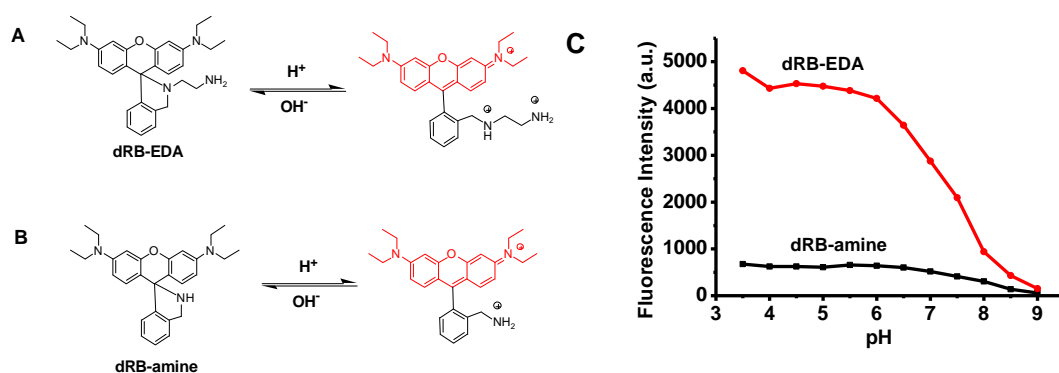

**Fig. S1** pH titration of dRB-amine and dRB-EDA by fluorometry. Proton triggered opening of the dRB-EDA (A) and dRB-amine (B); (C) pH profiles of dRB-EDA (in red) and dRB-amine (in dark) were plotted by fluorescence emission intensities at 590 nm as a function of buffer pH (3.5-9) ( $\lambda_{ex}$ @560 nm).

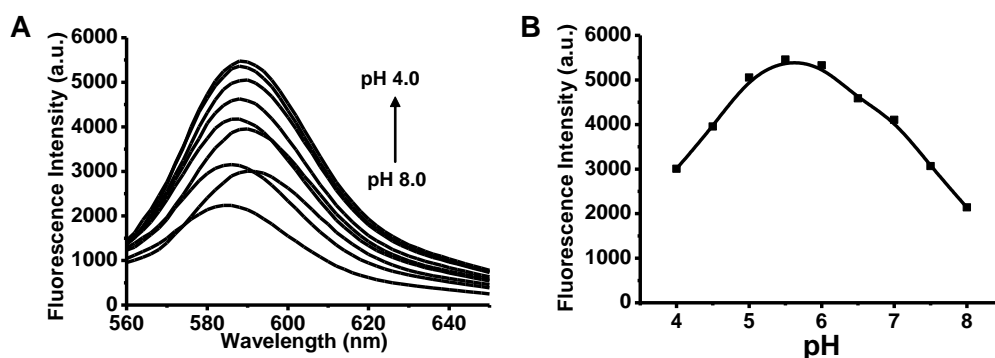

**Fig. S2** pH titration of PSM-2-dRB. (A) Fluorescence emission spectra of PSM-2-dRB (50  $\mu\text{g ml}^{-1}$ ) in sodium phosphate buffer of various pH (4-8) ( $\lambda_{ex}$ @560 nm); (B) the titration curve was plotted by fluorescence emission intensity at 590 nm vs buffer pH.

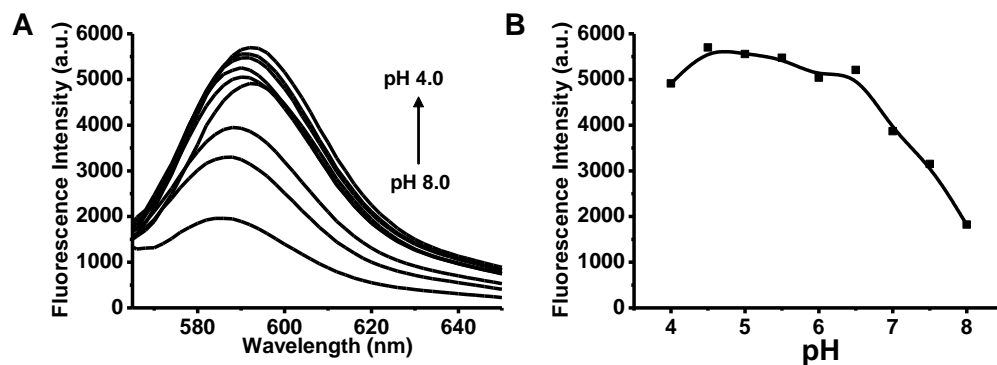

**Fig. S3** pH titration of PSM-1-dRB. (A) Fluorescence emission spectra of PSM-1-dRB ( $50 \mu\text{g ml}^{-1}$ ) in sodium phosphate buffer of various pH (4-8) ( $\lambda_{\text{ex}}@560 \text{ nm}$ ); (B) The titration curve was plotted by fluorescence emission intensity at 590 nm vs buffer pH.

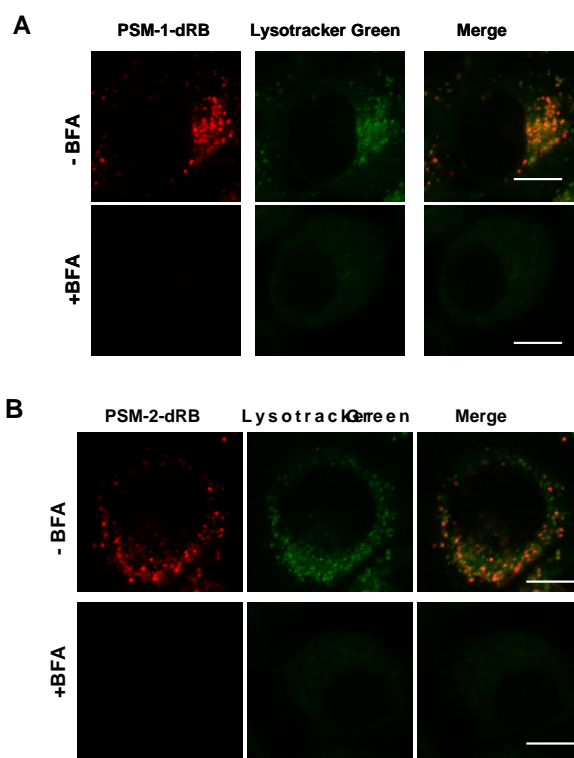

**Fig. S4** Lysosomal pH dependent staining of L929 cells with PSM-1-dRB and PSM-2-dRB. L929 cells pretreated with or without BFA were respectively co-stained with LysoTracker green and PSM-1-dRB/PSM-2-dRB, and then analyzed by confocal microscopy. The intracellular fluorescence of dRB-polymer was shown in red and that of LysoTracker green was shown in green. Merging of the signals of dRB-EDA and LysoTracker green was shown in yellow. Bars,  $10 \mu\text{m}$ .

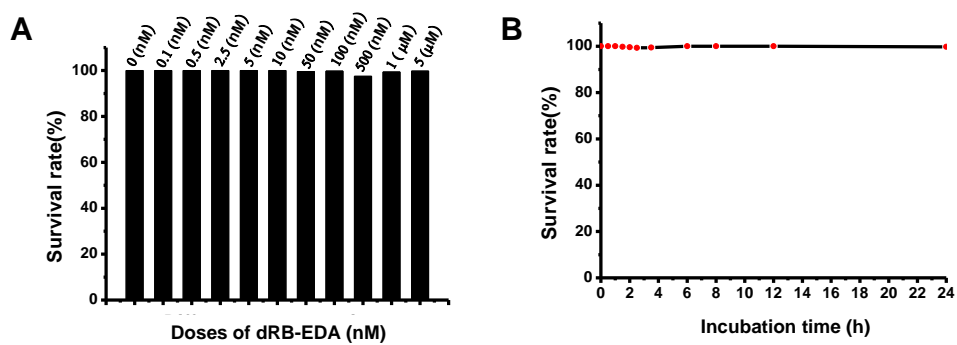

**Fig. S5** Cell toxicities of dRB-EDA on L929 cells. Cells were seeded in 48-well plates in DMEM medium supplemented with various amounts of PSSM-dRB. The cells were cultured at 37 °C with 5% CO<sub>2</sub>. Every 24 h, an aliquot of the cells was taken out and stained with trypan blue. Cell viability was determined using the trypan blue exclusion test.
